# Supplementary material for: Altered Transcriptome Response in PBMCs of Czech Adults Linked to Multiple PFAS Exposure: B Cell Development as a Target of PFAS Immunotoxicity
Source: PubMed Central journal article supplement (PMC10785749; doi:10.1021/acs.est.3c05109), 2023-12-19
Supplement: es3c05109_si_001.pdf [file es3c05109_si_001.pdf]

# Supplementary information for “Altered Transcriptome Response in PBMCs of Czech Adults Linked to Multiple PFAS Exposure: B Cell Development as a Target of PFAS Immunotoxicity”

**Authors:**

Barbora Rudzanova<sup>1</sup>, Vojtech Thon<sup>1</sup>, Hana Vespalcova<sup>1</sup>, Christopher J. Martyniuk<sup>2</sup>, Pavel Piler<sup>1</sup>, Martin Zvonar<sup>1,3</sup>, Jana Klanova<sup>1</sup>, Ludek Blaha<sup>1</sup>, Ondrej Adamovsky<sup>1</sup>, \*

**Affiliation:**

<sup>1</sup> RECETOX, Faculty of Science, Masaryk University, Kotlarska 2, 602 00, Brno, Czech Republic

<sup>2</sup> Department of Physiological Sciences and Center for Environmental and Human Toxicology, UF Genetics Institute, College of Veterinary Medicine, University of Florida, Gainesville, FL 32611, USA

<sup>3</sup> Department of Kinesiology, Faculty of Sports Studies, Kamenice 753/5, Brno, Czech Republic

\*Corresponding author: Ondrej Adamovsky, RECETOX, Faculty of Science, Masaryk University, Kamenice 753/5, pavilion D29, 625 00 Brno, Czech Republic, e-mail: [ondrej.adamovsky@recetox.muni.cz](mailto:ondrej.adamovsky@recetox.muni.cz)

**Summary:** 12 pages, 2 figures, 4 tables

| Table/figure                                                                                                                                                                    | Page   |
|---------------------------------------------------------------------------------------------------------------------------------------------------------------------------------|--------|
| <b>Table S1:</b> General characteristics of the study population.                                                                                                               | S2     |
| <b>Table S2:</b> Serum concentrations of 12 PFASs analysed in serum of CELSPAC: YA participants in ng/mL and detection frequency.                                               | S2     |
| <b>Figure S1:</b> Matrix expressing the correlation between serum levels of 7 studied PFASs. Statistically significant correlation is marked with * (p-value < 0.05).           | S3     |
| <b>Table S3:</b> Counts of significantly (p<0.05) associated genes with 7 studied PFASs.                                                                                        | S3     |
| <b>Figure S2:</b> Genes significantly associated (p < 0.05) with multiple PFAS exposure (with at least 4 PFASs).                                                                | S4-S7  |
| <b>Table S4:</b> Enriched gene sets or “entities” (p < 0.05) associated with multiple PFAS exposure (i.e., at least 4 PFASs) identified by gene set enrichment analysis (GSEA). | S8-S12 |

**Table S1:** General characteristics of the study population. Variables are described as median (1<sup>st</sup> quartile - 3<sup>rd</sup> quartile) or number of participants (respective percentage portion).

| Variable                   |                            | N = 288               |
|----------------------------|----------------------------|-----------------------|
| <b>Sex</b>                 | women                      | 145 (50.35%)          |
|                            | men                        | 143 (49.65%)          |
| <b>Age (years)</b>         |                            | 27 (26 - 27)          |
| <b>BMI</b>                 |                            | 23.48 (21.57 - 26.07) |
| <b>Smoking status</b>      | non-smokers                | 199 (69.1%)           |
|                            | smokers                    | 89 (30.9%)            |
| <b>Alcohol consumption</b> | rare ( $\leq$ once a week) | 157 (54.51%)          |
|                            | often ( $>$ once week)     | 131 (45.49%)          |
| <b>Education</b>           | primary and secondary      | 71 (24.65%)           |
|                            | university                 | 217 (75.35%)          |

**Smoking status:** Determined based on the answer to the question: “Have you smoked more than 100 cigarettes during your life?”.

**Alcohol consumption:** Determined based on the question: “How often did you drink alcohol in the last month?”.

BMI = body mass index.

**Table S2:** Serum concentrations of 12 PFASs analysed in serum of CELSPAC: YA participants in ng/mL and detection frequency.

|                          | PFPA | PFHxA | PFHpA | PFOA | PFNA  | PFDA  | PFUnDA | PFDoDA | PFBS | PFHxS | PFHpS | PFOS |
|--------------------------|------|-------|-------|------|-------|-------|--------|--------|------|-------|-------|------|
| Median                   | 0.13 | 0.03  | 0.01  | 1.13 | 0.32  | 0.13  | 0.06   | <0.01  | 0.06 | 0.34  | 0.04  | 1.96 |
| 1 <sup>st</sup> quartile | 0.08 | 0.03  | 0.01  | 0.87 | 0.23  | 0.10  | 0.04   | <0.01  | 0.03 | 0.21  | 0.03  | 1.35 |
| 3 <sup>rd</sup> quartile | 0.18 | 0.05  | 0.04  | 1.43 | 0.45  | 0.20  | 0.10   | 0.01   | 0.20 | 0.44  | 0.06  | 2.89 |
| >LOD                     | 97%  | 31%   | 30%   | 100% | 100%  | 100%  | 98%    | 14%    | 65%  | 100%  | 85%   | 100% |
| LOD (ng/mL)              | 0.01 | 0.01  | 0.01  | 0.02 | 0.004 | 0.004 | 0.004  | 0.005  | 0.01 | 0.004 | 0.005 | 0.03 |
| LOQ (ng/mL)              | 0.04 | 0.04  | 0.03  | 0.07 | 0.012 | 0.01  | 0.012  | 0.016  | 0.04 | 0.014 | 0.017 | 0.09 |

LOD = limit of detection, LOQ = limit of quantification, PFPA = Perfluoropentanoate, PFOA = Perfluorooctanoate, PFNA = Perfluorononanoate, PFDA = Perfluorodecanoate, PFUnDA = Perfluoroundecanoate, PFHxS = Pefluorohexane sulfonate, PFOS = Perfluorooctane sulfonate, PFHxA = Perfluorohexanoate, PFHpA = Perfluoroheptanoate, PFDoDA = Pefluorododecanoate, PFBS = Perfluorobutane sulfonate, PFHpS = Pefluoroheptane sulfonate.

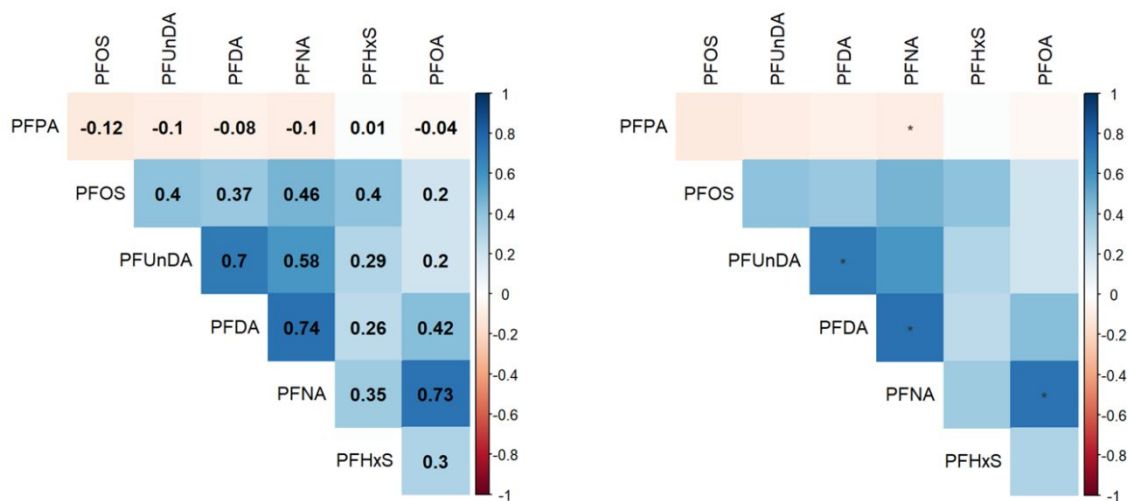

**Figure S1:** Matrix expressing the correlation between serum levels of 7 studied PFASs. Statistically significant correlation is marked with \* (p-value < 0.05).

**Table S3:** Counts of significantly (p<0.05) associated genes with 7 studied PFASs.

| PFDA | PFHxS | PFNA | PFOA | PFOS | PFPA | PFUnDA |
|------|-------|------|------|------|------|--------|
| 139  | 89    | 155  | 82   | 148  | 23   | 92     |

**Figure S2** (below): Genes significantly associated ( $p < 0.05$ ) with multiple PFAS exposure (with at least 4 PFASs). The left column contains  $\beta$  coefficient from linear regression and the right column contain corresponding p-values. In right column, red colour marks statistically significant results ( $p$ -value  $< 0.05$ ); colour in the left column indicates the positive (red) or negative (blue) association between gene and PFAS exposure. PFPA = Perfluoropentanoate, PFOA = Perfluorooctanoate, PFNA = Perfluorononanoate, PFDA = Perfluorodecanoate, PFUnDA = Perfluoroundecanoate, PFHxS = Pefluorohexane sulfonate, PFOS = Perfluorooctane sulfonate.

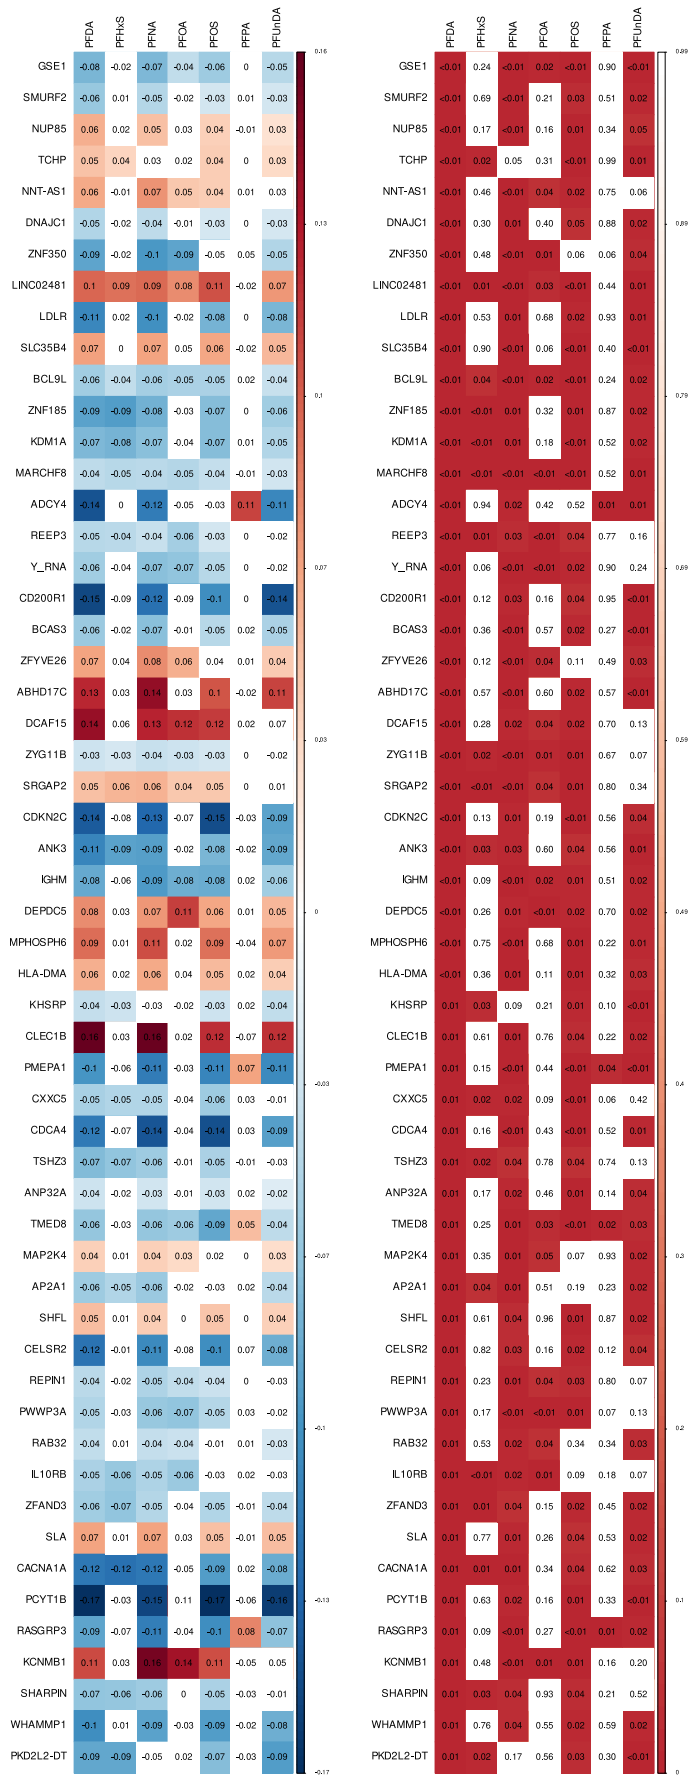

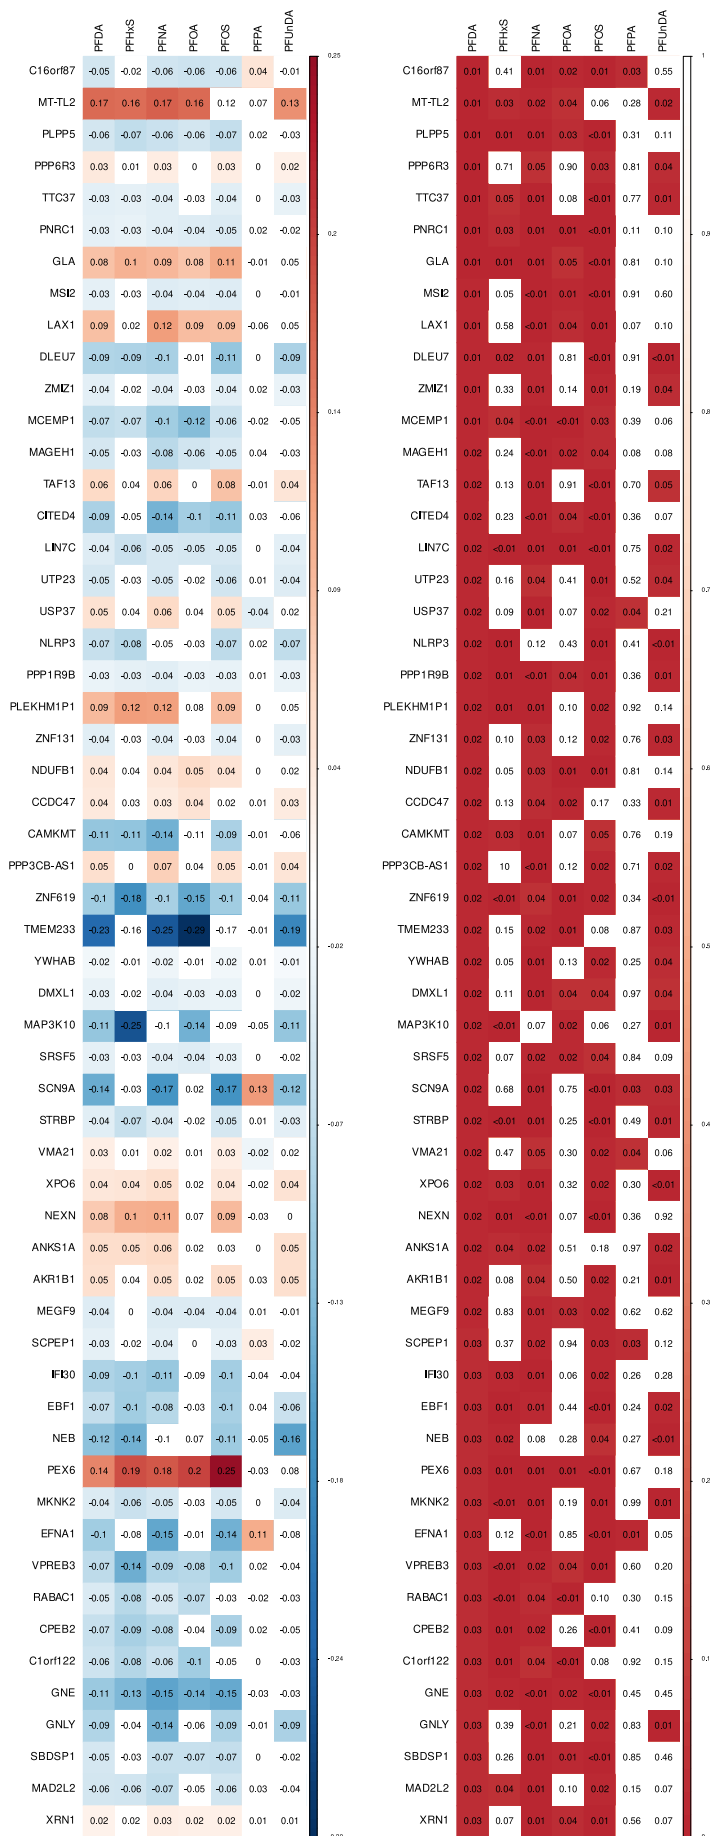

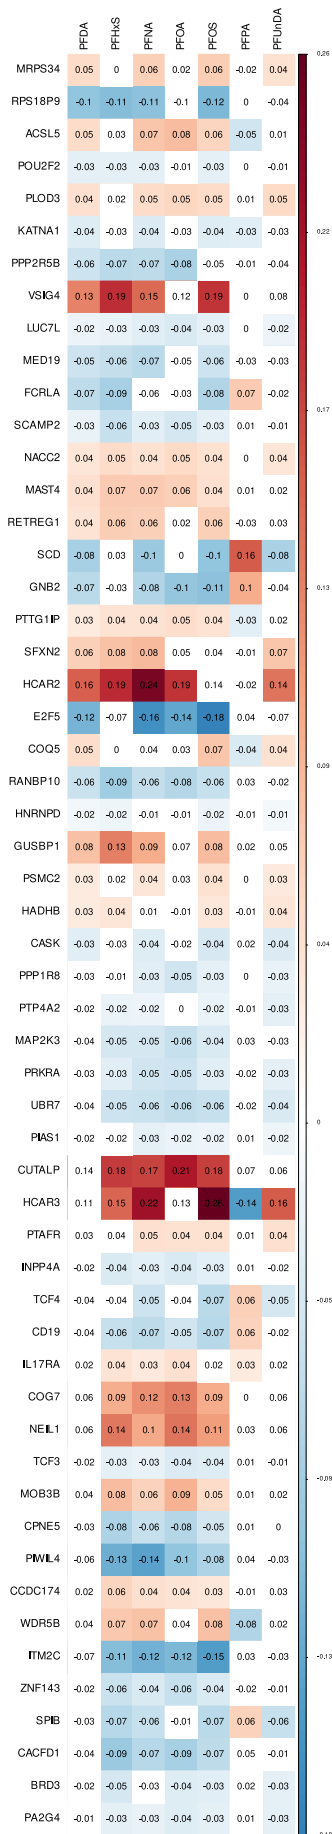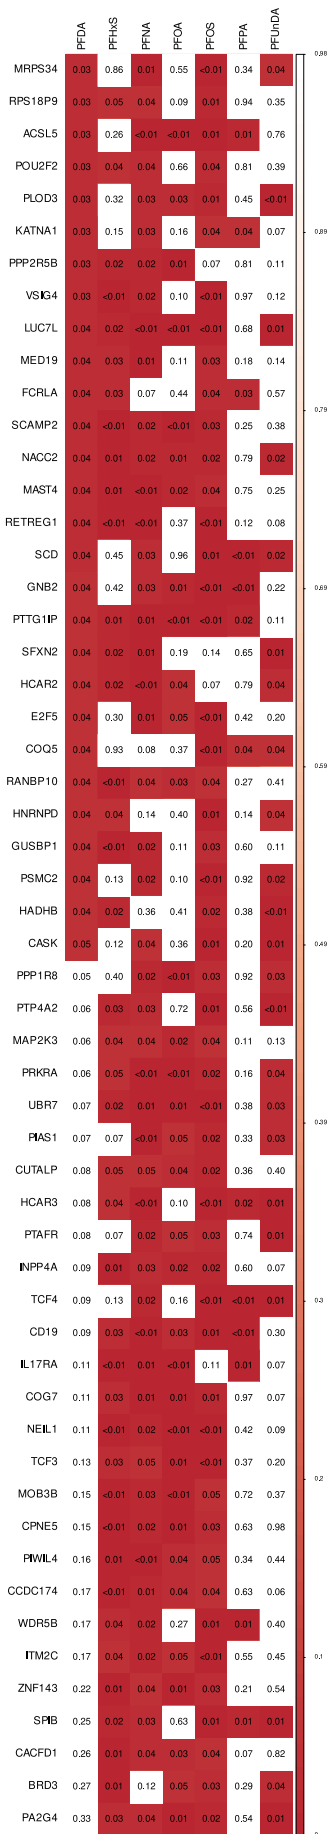

**Table S4:** Enriched gene sets or “entities” ( $p < 0.05$ ) associated with multiple PFAS exposure (i.e., at least 4 PFASs) identified by gene set enrichment analysis (GSEA). Provided in the table are the names of the category, overlapping genes, p-value for enrichment, and the broader category of classification.

| <b>Name</b>                                                             | <b>Overlapping Genes</b>      | <b>p-value</b> | <b>Hit type</b>    |
|-------------------------------------------------------------------------|-------------------------------|----------------|--------------------|
| Dendritic Spine Morphogenesis and Stabilization                         | <i>CASK; PPP1R9B; SHARPIN</i> | 0.003848       | Biological Process |
| Dopamine Receptors Signalling                                           | <i>ADCY4; MAP2K3; MAP2K4</i>  | 0.004445       | Biological Process |
| EDNRA/B -> Vascular Motility                                            | <i>ADCY4; MAP2K3; MAP2K4</i>  | 0.006719       | Biological Process |
| Circadian Clock Genes in Suprachiasmatic Nuclei Neurons                 | <i>ADCY4; MAP2K3; MAP2K4</i>  | 0.007896       | Biological Process |
| MTHFR Activity Regulation                                               | <i>MAP2K4; E2F5; CDCA4</i>    | 0.009778       | Biological Process |
| Dopamine Mediated Glutamate Release/Uptake Circle in Neuron in Migraine | <i>ADCY4; CACNA1A</i>         | 0.009862       | Biological Process |
| CNR1/2 -> IL1B/2/4/6/10 Production                                      | <i>ADCY4; MAP2K3; MAP2K4</i>  | 0.015813       | Biological Process |
| OPRL1 -> Ion Channels                                                   | <i>ADCY4; CACNA1A</i>         | 0.016555       | Biological Process |
| AXL Receptor Inhibits Macrophages and Dendritic Cells Function          | <i>MAP2K4; MAP2K3</i>         | 0.018183       | Biological Process |
| T-Cell Dependent B-Cell Activation                                      | <i>RASGRP3; MAP2K3; IGHM</i>  | 0.027713       | Biological Process |
| Vascular Endothelial Cell Activation by Cytokines                       | <i>ADCY4; MAP2K3; MAP2K4</i>  | 0.027713       | Biological Process |
| MHC2-Mediated Antigen Presentation                                      | <i>HLA-DMA; IFI30</i>         | 0.03133        | Biological Process |
| Norepinephrine Release Regulation                                       | <i>ADCY4; CACNA1A</i>         | 0.032028       | Biological Process |
| OPRD/OPRM -> Ion Channels                                               | <i>ADCY4; CACNA1A</i>         | 0.039338       | Biological Process |
| GRM1/5 (Postsynaptic) -> Ion Channels                                   | <i>ADCY4; CACNA1A</i>         | 0.043211       | Biological Process |



|                                                                 |                                     |              |                    |
|-----------------------------------------------------------------|-------------------------------------|--------------|--------------------|
| Toll-like Receptors in Sterile Inflammation                     | <i>MAP2K3; MAP2K4</i>               | 0.04479<br>8 | Biological Process |
| Synaptic Potentiation by PKMZ in LTP Maintenance - Active State | <i>ADCY4; CASK</i>                  | 0.04886<br>2 | Biological Process |
| CD72 -> AP-1 Expression Targets                                 | <i>MAP2K4; E2F5; CDCA4; MAP2K3</i>  | 0.00065<br>2 | Biomarkers         |
| TNF -> ELK-SRF Expression Targets                               | <i>MAP2K4; LDLR; MAP2K3</i>         | 0.00396<br>3 | Biomarkers         |
| PAF/Gq -> AP-1/ATF1/CREB/ERK/SRF Expression Targets             | <i>PTAFR; ADCY4; MAP2K3; MAP2K4</i> | 0.00429<br>3 | Biomarkers         |
| TNF -> CREB Expression Targets                                  | <i>LDLR; MAP2K3; MAP2K4</i>         | 0.00847<br>1 | Biomarkers         |
| TGFB1-TGFBR2 Expression Targets                                 | <i>PTAFR; LDLR; MAP2K3; MAP2K4</i>  | 0.00885      | Biomarkers         |
| TGFB3-TGFBR2 Expression Targets                                 | <i>MAP2K4; MAP2K3</i>               | 0.01097<br>1 | Biomarkers         |
| EDA Expression Targets                                          | <i>MAP2K4; MAP2K3</i>               | 0.01558<br>4 | Biomarkers         |
| TLR4 -> AP-1 Expression Targets                                 | <i>LDLR; MAP2K3; MAP2K4</i>         | 0.01772<br>7 | Biomarkers         |
| EDN3 Expression Targets                                         | <i>ADCY4; MAP2K3; MAP2K4</i>        | 0.01772<br>7 | Biomarkers         |
| Insulin -> MEF/MYOD Expression Targets                          | <i>PTAFR; LDLR; SCD; MAP2K3</i>     | 0.01986      | Biomarkers         |
| TLR7 Expression Targets                                         | <i>MAP2K4; MAP2K3</i>               | 0.02089      | Biomarkers         |
| TLR5 Expression Targets                                         | <i>MAP2K4; MAP2K3</i>               | 0.02183<br>8 | Biomarkers         |
| NOTCH Expression Targets                                        | <i>MAP2K3; MAP2K4; TCF3</i>         | 0.02204<br>3 | Biomarkers         |
| S1P Expression Targets                                          | <i>ADCY4; MAP2K3; MAP2K4</i>        | 0.02467<br>1 | Biomarkers         |
| TGFB2-TGFBR2 Expression Targets                                 | <i>MAP2K4; MAP2K3</i>               | 0.02479      | Biomarkers         |
| TLR9 Expression Targets                                         | <i>MAP2K4; MAP2K3</i>               | 0.02580<br>8 | Biomarkers         |

|                                                         |                               |              |              |
|---------------------------------------------------------|-------------------------------|--------------|--------------|
| TNFSF13 Expression Targets                              | <i>MAP2K4; MAP2K3</i>         | 0.02896<br>5 | Biomarkers   |
| EFNA1 -> STAT Expression Target                         | <i>EFNA1</i>                  | 0.03189<br>6 | Biomarkers   |
| LDLR -> Expression Targets in Lymphoid System and Blood | <i>LDLR; HCAR2</i>            | 0.03340<br>3 | Biomarkers   |
| IL16-> ATF/CREB/CREBBP Expression Target                | <i>MAP2K4; MAP2K3</i>         | 0.03455<br>2 | Biomarkers   |
| TLR4 -> AP-1/EGR1/HIF1A Expression Targets              | <i>PTAFR; MAP2K3; MAP2K4</i>  | 0.03484      | Biomarkers   |
| Dronabinol/Anandamide Expression Targets                | <i>ADCY4; MAP2K3; MAP2K4</i>  | 0.03616<br>1 | Biomarkers   |
| TNFSF14 Expression Targets                              | <i>MAP2K4; MAP2K3</i>         | 0.03689<br>7 | Biomarkers   |
| TNF -> AP-1 Expression Targets                          | <i>LDLR; MAP2K3; MAP2K4</i>   | 0.03957<br>9 | Biomarkers   |
| TNFSF10 Expression Targets                              | <i>MAP2K4; MAP2K3</i>         | 0.04176<br>7 | Biomarkers   |
| VEGFC -> ATF Expression Target                          | <i>MAP2K4; MAP2K3</i>         | 0.04176<br>7 | Biomarkers   |
| AVP/Gs -> CREB/ELK/SRF/AP-1/EGR Expression Targets      | <i>ADCY4; MAP2K3; MAP2K4</i>  | 0.04243      | Biomarkers   |
| CD8 -> NF-kB Expression Targets                         | <i>MAP2K4; MAP2K3</i>         | 0.04428<br>9 | Biomarkers   |
| CD72 -> NF-kB Expression Targets                        | <i>MAP2K4; MAP2K3</i>         | 0.04817<br>7 | Biomarkers   |
| Hematopoietic Cell Lineage: B-cell                      | <i>CD19; EBF1; TCF3; IGHM</i> | 0.01080<br>2 | Cell Lineage |
| Hematopoietic Cell Lineage: B-cell (mouse)              | <i>CD19; EBF1; TCF3; IGHM</i> | 0.01195<br>3 | Cell Lineage |
| Golgi to Endosome Transport                             | <i>COG7; RASGRP3; AP2A1</i>   | 0.00321<br>8 | Cell Process |
| G1/S Phase Transition                                   | <i>E2F5; CDCA4; PPP1R8</i>    | 0.00470<br>8 | Cell Process |

|                                                       |                                      |              |              |
|-------------------------------------------------------|--------------------------------------|--------------|--------------|
| Histone Sumoylation                                   | <i>KDM1A; PIAS1</i>                  | 0.00725<br>1 | Cell Process |
| Protein Nuclear Import and Export                     | <i>NUP85; XPO6</i>                   | 0.01210<br>9 | Cell Process |
| Cell Cycle Overview                                   | <i>CDCA4; CDKN2C; YWHAB; E2F5</i>    | 0.01490<br>6 | Cell Process |
| S/G2 Phase Transition                                 | <i>CDCA4; PPP1R8; E2F5</i>           | 0.01597<br>1 | Cell Process |
| G0/G1 Phase Transition                                | <i>E2F5; CDCA4</i>                   | 0.01987<br>5 | Cell Process |
| RNA Gene Silencing                                    | <i>PRKRA; NUP85</i>                  | 0.02539      | Cell Process |
| Axonal Transport                                      | <i>YWHAB; AP2A1</i>                  | 0.02539      | Cell Process |
| Endosomal Recycling                                   | <i>LDLR; AP2A1</i>                   | 0.02580<br>5 | Cell Process |
| Hodgkin and Reed-Sternberg Cells Reprogramming        | <i>POU2F2; EBF1; TCF3</i>            | 0.00143<br>8 | Disease      |
| Cell Cycle Dysregulation in Mantle Cell Lymphoma      | <i>CDKN2C; E2F5; CDCA4</i>           | 0.00150<br>8 | Disease      |
| Monocytes Function in Gout                            | <i>MAP2K3; MAP2K4; NLRP3</i>         | 0.00224      | Disease      |
| Majeed Syndrome                                       | <i>NLRP3; AKR1B1; MAP2K3; MAP2K4</i> | 0.00287<br>2 | Disease      |
| Humoral Immunity in Vitiligo                          | <i>CD19; RASGRP3; MAP2K3; IGHM</i>   | 0.00300<br>4 | Disease      |
| TGFB2 Signalling Impairment in Osteoarthritis         | <i>SMURF2; MAP2K3</i>                | 0.00450<br>4 | Disease      |
| Synovial Fibroblast Activation in Psoriatic Arthritis | <i>IL17RA; MAP2K3; MAP2K4</i>        | 0.00485<br>3 | Disease      |
| Immune System Role in Otitis Media                    | <i>MAP2K3; MAP2K4; NLRP3</i>         | 0.00629      | Disease      |
| Inflammatory Reaction in Acne Vulgaris                | <i>MAP2K3; MAP2K4; NLRP3</i>         | 0.00718<br>8 | Disease      |
| B-Cells Function in Systemic Scleroderma              | <i>CD19; RASGRP3; MAP2K3; IGHM</i>   | 0.00755<br>1 | Disease      |

|                                                                   |                                     |              |         |
|-------------------------------------------------------------------|-------------------------------------|--------------|---------|
| Dendritic Cell Function in Ulcerative Colitis                     | <i>MAP2K3; MAP2K4; NLRP3</i>        | 0.00776<br>1 | Disease |
| Hypoparathyroidism, Primary                                       | <i>KHSRP; HNRNPD</i>                | 0.00791<br>2 | Disease |
| Ions Reabsorption Dysregulation in Nephrolithiasis                | <i>ADCY4; TCF3</i>                  | 0.01017<br>7 | Disease |
| Autocrine Cytokine/Chemokine Loops in Systemic Scleroderma        | <i>MAP2K4; MAP2K3</i>               | 0.01217<br>2 | Disease |
| Lipodystrophy, Familial Partial                                   | <i>SCD; LDLR</i>                    | 0.01377      | Disease |
| Hyperparathyroidism, Neonatal Severe                              | <i>KHSRP; HNRNPD</i>                | 0.01377      | Disease |
| MicroRNAs Role in Melanoma                                        | <i>E2F5; CDCA4</i>                  | 0.01488<br>4 | Disease |
| Alveolar Macrophages Dysfunction in COPD                          | <i>NLRP3; MAP2K3; MAP2K4</i>        | 0.01737<br>3 | Disease |
| CFTR Expression in Epithelial Cells (Class I Mutations)           | <i>ADCY4; MAP2K3</i>                | 0.02035<br>2 | Disease |
| Dopamine Mediated Glutamate Release and Glutamate Uptake Circle   | <i>ADCY4; CACNA1A</i>               | 0.02166<br>5 | Disease |
| Lipid Metabolism Impairment in non-Alcoholic Fatty Liver Disease  | <i>SCD; LDLR</i>                    | 0.02233<br>4 | Disease |
| Bone Loss in Osteoporosis                                         | <i>SMURF2; MAP2K3</i>               | 0.02439<br>4 | Disease |
| TNF and IL1B Induce Metalloproteinase Synthesis in Osteoarthritis | <i>MAP2K3; MAP2K4</i>               | 0.02439<br>4 | Disease |
| CFTR Facilitates Oxidative Stress in Airway Epithelium in CF      | <i>ADCY4; MAP2K3; MAP2K4</i>        | 0.03109<br>5 | Disease |
| Airway Epithelial Cell Dysfunction                                | <i>ADCY4; MAP2K3; MAP2K4; PIAS1</i> | 0.03165<br>4 | Disease |
| Microglia and Motor Neuron Interaction Dysregulation              | <i>MAP2K3; CD200R1</i>              | 0.03178<br>8 | Disease |
| Alveolar Macrophage Negative Regulation Declined in COPD          | <i>CD200R1; IL10RB</i>              | 0.03577<br>6 | Disease |

|                                                                     |                                           |              |                         |
|---------------------------------------------------------------------|-------------------------------------------|--------------|-------------------------|
| Dendritic Cells Function in Atherosclerosis                         | <i>MAP2K3; MAP2K4</i>                     | 0.03659<br>6 | Disease                 |
| Hyperseborrhea in Acne Vulgaris                                     | <i>ADCY4; LDLR</i>                        | 0.03659<br>6 | Disease                 |
| B-Cell Mediated IgE Production in Asthma                            | <i>YWHAB; IGHM</i>                        | 0.04080<br>3 | Disease                 |
| Cell Cycle Dysregulation in Melanoma                                | <i>E2F5; CDCA4</i>                        | 0.04166<br>5 | Disease                 |
| TLR2 Induced Synovial Fibroblast Activation in Rheumatoid Arthritis | <i>MAP2K3; MAP2K4</i>                     | 0.04253<br>4 | Disease                 |
| Mucin Production in Goblet Airway Epithelial Cells                  | <i>MAP2K3; MAP2K4</i>                     | 0.04341      | Disease                 |
| Mucin Hyperproduction in Goblet and Mucous Cells                    | <i>MAP2K3; MAP2K4</i>                     | 0.04880<br>7 | Disease                 |
| Fatty Acid Oxidation                                                | <i>ACSL5; HADHB</i>                       | 0.02274<br>2 | Metabolic<br>Pathway    |
| Metabolic Effects of Oncogenes and Tumor Suppressor in Cancer Cells | <i>SCD; LDLR; TCF4</i>                    | 0.00307<br>6 | Pathological<br>Process |
| VEGF Independent Angiogenesis in Cancer                             | <i>RASGRP3; MAP2K4; EFNA1</i>             | 0.03983<br>1 | Pathological<br>Process |
| NOTCH -> TCF3 Signalling                                            | <i>MAP2K4; MAP2K3; TCF3</i>               | 0.00019<br>2 | Signal Processing       |
| P38 MAPK/MAPK14 Signalling                                          | <i>MAP2K4; MKNK2; MAP3K10;<br/>MAP2K3</i> | 0.00033<br>6 | Signal Processing       |
| TNFRSF6 -> DDIT3 Signalling                                         | <i>MAP2K4; MAP2K3</i>                     | 0.00183<br>6 | Signal Processing       |
| JNK/MAPK Signalling                                                 | <i>YWHAB; MAP2K4; MAP3K10</i>             | 0.00210<br>2 | Signal Processing       |
| TGFBR -> AP-1 Signalling                                            | <i>MAP2K4; MAP2K3</i>                     | 0.00240<br>8 | Signal Processing       |
| TGFBR -> ATF/GADD/MAX/TP53 Signalling                               | <i>MAP2K4; MAP2K3</i>                     | 0.00272<br>1 | Signal Processing       |
| TGFBR -> CREB/ELK-SRF Signalling                                    | <i>MAP2K4; MAP2K3</i>                     | 0.00305<br>3 | Signal Processing       |

|                                                            |                              |              |                   |
|------------------------------------------------------------|------------------------------|--------------|-------------------|
| NGFR -> MEF Signalling                                     | <i>MAP2K4; MAP2K3</i>        | 0.00497<br>7 | Signal Processing |
| TGFBR -> MEF/MYOD/MYOG Signalling                          | <i>MAP2K4; MAP2K3</i>        | 0.00682<br>7 | Signal Processing |
| Sialophorin -> CTNNB/MYC/TP53 Signalling                   | <i>MAP2K4; MAP2K3</i>        | 0.00733<br>1 | Signal Processing |
| T-Cell Receptor -> ATF/CREB Signalling                     | <i>MAP2K4; MAP2K3</i>        | 0.01131<br>4 | Signal Processing |
| NGFR -> AP-1/CEBPB/CREB/ELK/SRF/TP53 Signalling            | <i>MAP2K4; MAP2K3</i>        | 0.01325<br>4 | Signal Processing |
| TNFR -> AP-1/ATF/TP53 Signalling                           | <i>MAP2K4; MAP2K3</i>        | 0.01393<br>1 | Signal Processing |
| EDNRA/B -> Vascular Motility                               | <i>ADCY4; MAP2K3; MAP2K4</i> | 0.01601<br>2 | Signal Processing |
| B-Cell Receptor -> NFATC Signalling                        | <i>CD19; IGHM</i>            | 0.01753<br>6 | Signal Processing |
| HCAR1/HCAR2 -> MAPK Signalling                             | <i>ADCY4; HCAR2</i>          | 0.01753<br>6 | Signal Processing |
| TNFR -> CREB/ELK-SRF Signalling                            | <i>MAP2K4; MAP2K3</i>        | 0.01753<br>6 | Signal Processing |
| TLR -> AP-1 Signalling                                     | <i>MAP2K4; MAP2K3</i>        | 0.01907<br>8 | Signal Processing |
| TNFRSF1A -> AP-1/ATF/TP53 Signalling                       | <i>MAP2K4; MAP2K3</i>        | 0.01986<br>9 | Signal Processing |
| FibronectinR -> NF-kB Signalling                           | <i>MAP2K4; MAP2K3</i>        | 0.02149<br>4 | Signal Processing |
| TNFRSF1A -> CREB/ELK-SRF Signalling                        | <i>MAP2K4; MAP2K3</i>        | 0.02403<br>1 | Signal Processing |
| Frizzled Receptors -> ARRB1/ARRB2 non-Canonical Signalling | <i>MAP2K4; MAP2K3</i>        | 0.02578<br>8 | Signal Processing |
| IL22R -> STAT3 Signalling                                  | <i>IL10RB</i>                | 0.02772      | Signal Processing |
| B-Cell Receptor -> NF-kB Signalling                        | <i>CD19; IGHM</i>            | 0.02945<br>6 | Signal Processing |

|                                      |                              |              |                   |
|--------------------------------------|------------------------------|--------------|-------------------|
| OPRL1 -> Ion Channels                | <i>ADCY4; CACNA1A</i>        | 0.03040<br>3 | Signal Processing |
| CNR1/2 -> IL1B/2/4/6/10 Production   | <i>ADCY4; MAP2K3; MAP2K4</i> | 0.03645<br>5 | Signal Processing |
| IL10R -> STAT Signalling             | <i>IL10RB</i>                | 0.03679<br>6 | Signal Processing |
| AngiopoietinR -> AP-1 Signalling     | <i>MAP2K4; MAP2K3</i>        | 0.03946<br>7 | Signal Processing |
| B-Cell Receptor -> AP-1 Signalling   | <i>CD19; IGHM</i>            | 0.04489<br>7 | Signal Processing |
| VEGFR -> ATF/CREB/ELK-SRF Signalling | <i>MAP2K4; MAP2K3</i>        | 0.04489<br>7 | Signal Processing |
| PDGFR -> AP-1/MYC Signalling         | <i>MAP2K4; MAP2K3</i>        | 0.04601<br>5 | Signal Processing |
